# Supplementary material for: Biochemical and Molecular Characteristics of a Novel Hyaluronic Acid Lyase from Citrobacter freundii
Source: MDPI journal article supplement (doi:10.3390/foods11131989), 2022-07-05
Supplement: s1 [file s1]

# Supporting information for publication

## **Biochemical and molecular characteristics of a novel hyaluronate lyase from *Citrobacter freundii***

Xinyue Li<sup>2</sup>, Fang Li<sup>2</sup>, Junhao Ma<sup>2</sup>, Mingjun Li<sup>2</sup>, Xi Lei<sup>2</sup>, Xianghua Tang<sup>1, 2, 3, 4</sup>, Qian Wu<sup>1, 2, 3, 4</sup>, Rui Zhang<sup>1, 2, 3, 4, \*</sup>, Zunxi Huang<sup>1, 2, 3, 4, \*</sup>

<sup>1</sup>Engineering Research Center of Sustainable Development and Utilization of Biomass Energy, Ministry of Education, Yunnan Normal University, Kunming, China;

<sup>2</sup>College of Life Sciences; Yunnan Normal University; Kunming, China;

<sup>3</sup>Key Laboratory of Yunnan for Biomass Energy and Biotechnology of Environment, Yunnan Normal University, Kunming, China;

<sup>4</sup>Key Laboratory of Yunnan Provincial Education Department for Plateau Characteristic Food Enzymes, Yunnan Normal University, Kunming, China

Running title: A novel hyaluronate lyase from *Citrobacter freundii*

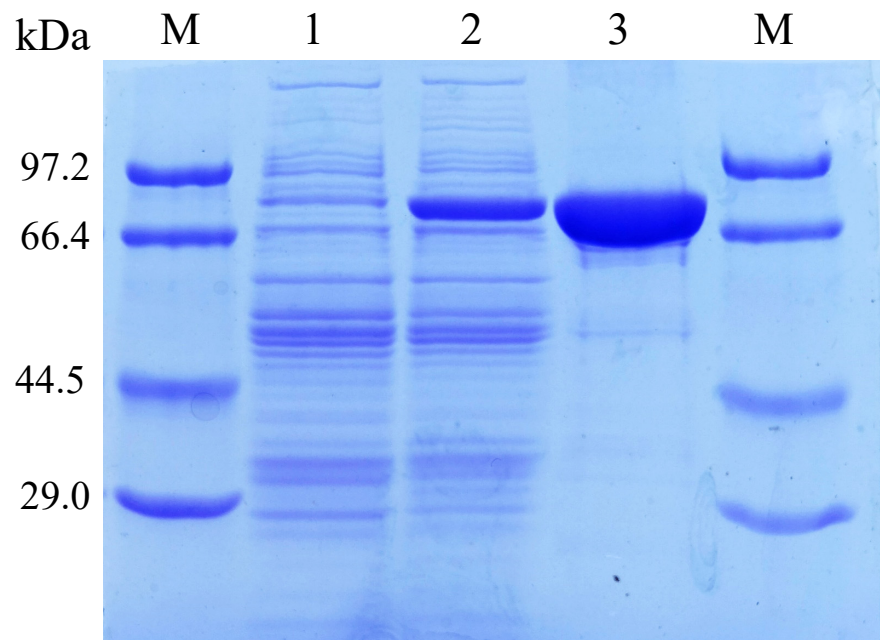

**Figure S1.** SDS-PAGE analysis.

Lanes: M, protein molecular weight marker; 1 culture supernatant of induced transformant harboring the empty plasmid, 2 culture supernatant of the induced transformant harboring *pEASY-hynACF8*, 3 purified recombinant HynACF8 by  $\text{Ni}^{2+}$ -NTA.

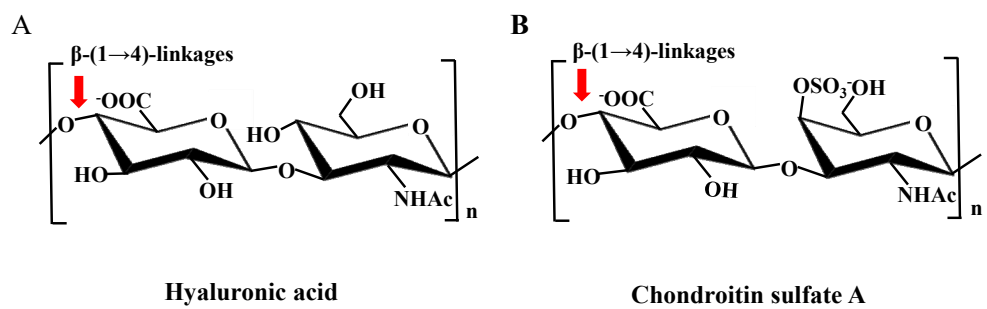

**Figure S2.** The illustration of substrate structures degraded by purified rHynACF8.

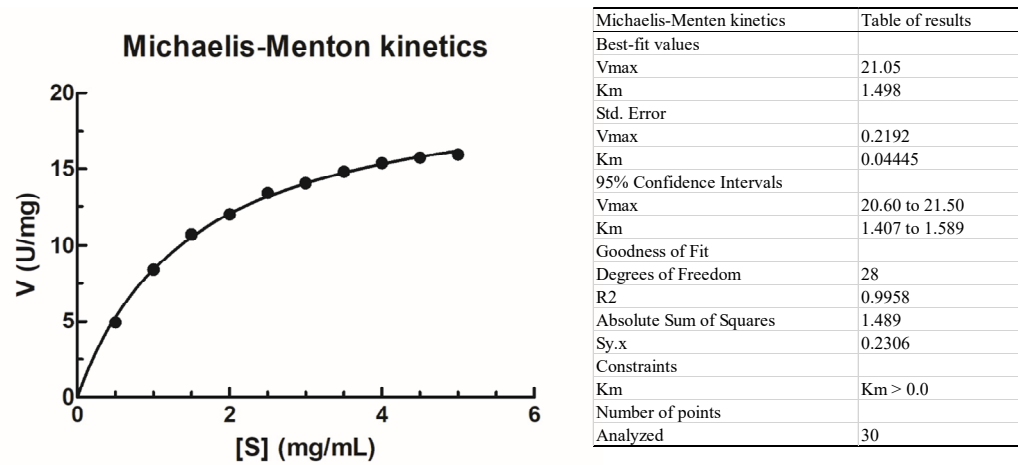

**Figure S3.** Kinetic characterization of purified rHynACF8.

**Table S1.** Effects of anions in metal salts on purified rHynACF8

| <b>substance</b>                | <b>activity-relative activity (%)<sup>a</sup></b> | <b>stability-relative activity (%)<sup>a</sup></b> |
|---------------------------------|---------------------------------------------------|----------------------------------------------------|
| NaCl                            | 126.9±2.9                                         | 79.4±1.6                                           |
| Na <sub>2</sub> SO <sub>4</sub> | 84.2±5.0                                          | 140.7±4.7                                          |
| NaAc                            | 88.6±4.3                                          | 102.5±3.4                                          |

<sup>a</sup> Values represent the means ± SD (n = 3) relative to the untreated control sample.
